# Supplementary material
Source: ML conference proceedings conference paper supplement (https://proceedings.neurips.cc/paper_files/paper/2022/hash/029f82afd78288059dc946b105c451fd-Abstract.html)
Supplement: Supplementary file 1 [file 029f82afd78288059dc946b105c451fd-Supplemental-Conference.zip]

Archive with 11 entries (8 files):
- Supplementary Material/
- Supplementary Material/code/
- Supplementary Material/code/.gitignore
- Supplementary Material/code/atpc.py
- Supplementary Material/code/database_conf/
- Supplementary Material/code/database_conf/example.json
- Supplementary Material/code/environment.yaml
- Supplementary Material/code/get_coreset.py
- Supplementary Material/code/README.md
- Supplementary Material/code/run.sh
- Supplementary Material/Supplementary Material.pdf
