# Supplementary material
Source: ML conference proceedings conference paper supplement (https://proceedings.neurips.cc/paper_files/paper/2022/hash/029f82afd78288059dc946b105c451fd-Abstract.html)
Supplement: Supplementary file 1 [file 029f82afd78288059dc946b105c451fd-Supplemental-Conference.zip › Supplementary Material/code/database_conf/example.json]

{
    "user_name": "***",
    "password": "***",
    "port": 5432,
    "ip": "127.0.0.1",
    "database": "credit",
    "temp_buffers": "1GB",
    "work_mem": "1GB",
    "cpu_num": 50,
    "tables": {
        "application": ["amt_income_total", "amt_credit", "region_population_relative", "days_birth", "days_employed", "days_registration", "days_id_publish", "hour_appr_process_start", "sk_id_curr"],
        "previous": ["amt_application", "hour_appr_process_start",
            "days_decision", "sellerplace_area", "sk_id_curr", "sk_id_prev"
        ],
        "credit_card": ["months_balance", "amt_credit_limit_actual", "sk_id_prev"],
        "bureau": ["days_credit", "days_credit_update", "sk_id_curr"],
        "installments": ["num_instalment_number", "days_instalment", "amt_instalment", "sk_id_prev"]
    },
    "connects": [
        [
            [
                ["previous", "sk_id_prev"],
                ["credit_card", "sk_id_prev"],
                ["installments", "sk_id_prev"]
            ], ""
        ],
        [
            [
                ["previous", "sk_id_curr"],
                ["application", "sk_id_curr"],
                ["bureau", "sk_id_curr"]
            ], ""
        ]
    ]
}
