# Supplementary material
Source: ML conference proceedings conference paper supplement (https://proceedings.neurips.cc/paper_files/paper/2022/hash/029f82afd78288059dc946b105c451fd-Abstract.html)
Supplement: Supplementary file 1 [file 029f82afd78288059dc946b105c451fd-Supplemental-Conference.zip › Supplementary Material/code/environment.yaml]

name: base
channels:
  - https://mirrors.tuna.tsinghua.edu.cn/anaconda/cloud/conda-forge
  - conda-forge
  - https://mirrors.tuna.tsinghua.edu.cn/anaconda/pkgs/main
  - defaults
dependencies:
  - _anaconda_depends=2020.07=py38_0
  - _ipyw_jlab_nb_ext_conf=0.1.0=py38_0
  - _libgcc_mutex=0.1=main
  - alabaster=0.7.12=pyhd3eb1b0_0
  - anaconda=custom=py38_1
  - anaconda-client=1.7.2=py38_0
  - anaconda-navigator=2.0.3=py38_0
  - anaconda-project=0.9.1=pyhd3eb1b0_1
  - anyio=2.2.0=py38h06a4308_1
  - appdirs=1.4.4=py_0
  - argh=0.26.2=py38_0
  - argon2-cffi=20.1.0=py38h27cfd23_1
  - asn1crypto=1.4.0=py_0
  - astroid=2.5=py38h06a4308_1
  - astropy=4.2.1=py38h27cfd23_1
  - async_generator=1.10=pyhd3eb1b0_0
  - atomicwrites=1.4.0=py_0
  - attrs=20.3.0=pyhd3eb1b0_0
  - autopep8=1.5.6=pyhd3eb1b0_0
  - babel=2.9.0=pyhd3eb1b0_0
  - backcall=0.2.0=pyhd3eb1b0_0
  - backports=1.0=pyhd3eb1b0_2
  - backports.functools_lru_cache=1.6.4=pyhd3eb1b0_0
  - backports.shutil_get_terminal_size=1.0.0=pyhd3eb1b0_3
  - backports.tempfile=1.0=pyhd3eb1b0_1
  - backports.weakref=1.0.post1=py_1
  - bayesian-optimization=1.1.0=py_0
  - beautifulsoup4=4.9.3=pyha847dfd_0
  - bitarray=2.1.0=py38h27cfd23_1
  - bkcharts=0.2=py38_0
  - black=19.10b0=py_0
  - blas=1.0=mkl
  - bleach=3.3.0=pyhd3eb1b0_0
  - blosc=1.21.0=h8c45485_0
  - bokeh=2.3.2=py38h06a4308_0
  - boto=2.49.0=py38_0
  - bottleneck=1.3.2=py38heb32a55_1
  - brotlipy=0.7.0=py38h27cfd23_1003
  - bzip2=1.0.8=h7b6447c_0
  - c-ares=1.17.1=h27cfd23_0
  - ca-certificates=2022.5.18.1=ha878542_0
  - cairo=1.16.0=hf32fb01_1
  - certifi=2022.5.18.1=py38h578d9bd_0
  - cffi=1.14.5=py38h261ae71_0
  - chardet=4.0.0=py38h06a4308_1003
  - click=7.1.2=pyhd3eb1b0_0
  - cloudpickle=1.6.0=py_0
  - clyent=1.2.2=py38_1
  - colorama=0.4.4=pyhd3eb1b0_0
  - conda=4.12.0=py38h578d9bd_0
  - conda-build=3.21.4=py38h06a4308_0
  - conda-content-trust=0.1.1=pyhd3eb1b0_0
  - conda-env=2.6.0=1
  - conda-package-handling=1.7.3=py38h27cfd23_1
  - conda-repo-cli=1.0.4=pyhd3eb1b0_0
  - conda-token=0.3.0=pyhd3eb1b0_0
  - conda-verify=3.4.2=py_1
  - contextlib2=0.6.0.post1=py_0
  - cryptography=3.4.7=py38hd23ed53_0
  - cudatoolkit=10.1.243=h6bb024c_0
  - cudnn=7.6.5.32=hc0a50b0_1
  - cupy=8.3.0=py38hcaf9a05_0
  - curl=7.71.1=hbc83047_1
  - cycler=0.10.0=py38_0
  - cython=0.29.23=py38h2531618_0
  - cytoolz=0.11.0=py38h7b6447c_0
  - dask=2021.4.0=pyhd3eb1b0_0
  - dask-core=2021.4.0=pyhd3eb1b0_0
  - dbus=1.13.18=hb2f20db_0
  - defusedxml=0.7.1=pyhd3eb1b0_0
  - diff-match-patch=20200713=py_0
  - distributed=2021.4.1=py38h06a4308_0
  - docutils=0.17.1=py38h06a4308_1
  - entrypoints=0.3=py38_0
  - et_xmlfile=1.0.1=py_1001
  - expat=2.3.0=h2531618_2
  - fastcache=1.1.0=py38h7b6447c_0
  - fastrlock=0.6=py38h2531618_0
  - filelock=3.0.12=pyhd3eb1b0_1
  - flake8=3.9.0=pyhd3eb1b0_0
  - flask=1.1.2=pyhd3eb1b0_0
  - fontconfig=2.13.1=h6c09931_0
  - freetype=2.10.4=h5ab3b9f_0
  - fribidi=1.0.10=h7b6447c_0
  - fsspec=0.9.0=pyhd3eb1b0_0
  - future=0.18.2=py38_1
  - get_terminal_size=1.0.0=haa9412d_0
  - gevent=21.1.2=py38h27cfd23_1
  - glib=2.68.1=h36276a3_0
  - glob2=0.7=pyhd3eb1b0_0
  - gmp=6.2.1=h2531618_2
  - gmpy2=2.0.8=py38hd5f6e3b_3
  - graphite2=1.3.14=h23475e2_0
  - greenlet=1.0.0=py38h2531618_2
  - gst-plugins-base=1.14.0=h8213a91_2
  - gstreamer=1.14.0=h28cd5cc_2
  - h5py=2.10.0=py38h7918eee_0
  - harfbuzz=2.8.0=h6f93f22_0
  - hdf5=1.10.4=hb1b8bf9_0
  - heapdict=1.0.1=py_0
  - html5lib=1.1=py_0
  - icu=58.2=he6710b0_3
  - idna=2.10=pyhd3eb1b0_0
  - imageio=2.9.0=pyhd3eb1b0_0
  - imagesize=1.2.0=pyhd3eb1b0_0
  - importlib-metadata=3.10.0=py38h06a4308_0
  - importlib_metadata=3.10.0=hd3eb1b0_0
  - iniconfig=1.1.1=pyhd3eb1b0_0
  - intel-openmp=2021.2.0=h06a4308_610
  - intervaltree=3.1.0=py_0
  - ipykernel=5.3.4=py38h5ca1d4c_0
  - ipython=7.22.0=py38hb070fc8_0
  - ipython_genutils=0.2.0=pyhd3eb1b0_1
  - ipywidgets=7.6.3=pyhd3eb1b0_1
  - isort=5.8.0=pyhd3eb1b0_0
  - itsdangerous=1.1.0=pyhd3eb1b0_0
  - jbig=2.1=hdba287a_0
  - jdcal=1.4.1=py_0
  - jedi=0.17.2=py38h06a4308_1
  - jeepney=0.6.0=pyhd3eb1b0_0
  - jinja2=2.11.3=pyhd3eb1b0_0
  - joblib=1.0.1=pyhd3eb1b0_0
  - jpeg=9b=h024ee3a_2
  - json5=0.9.5=py_0
  - jsonschema=3.2.0=py_2
  - jupyter=1.0.0=py38_7
  - jupyter-packaging=0.7.12=pyhd3eb1b0_0
  - jupyter_client=6.1.12=pyhd3eb1b0_0
  - jupyter_console=6.4.0=pyhd3eb1b0_0
  - jupyter_core=4.7.1=py38h06a4308_0
  - jupyter_server=1.4.1=py38h06a4308_0
  - jupyterlab=3.0.14=pyhd3eb1b0_1
  - jupyterlab_pygments=0.1.2=py_0
  - jupyterlab_server=2.4.0=pyhd3eb1b0_0
  - jupyterlab_widgets=1.0.0=pyhd3eb1b0_1
  - keyring=22.3.0=py38h06a4308_0
  - kiwisolver=1.3.1=py38h2531618_0
  - krb5=1.18.2=h173b8e3_0
  - lazy-object-proxy=1.6.0=py38h27cfd23_0
  - lcms2=2.12=h3be6417_0
  - ld_impl_linux-64=2.33.1=h53a641e_7
  - libarchive=3.4.2=h62408e4_0
  - libcurl=7.71.1=h20c2e04_1
  - libedit=3.1.20210216=h27cfd23_1
  - libev=4.33=h7b6447c_0
  - libffi=3.3=he6710b0_2
  - libgcc-ng=9.1.0=hdf63c60_0
  - libgfortran-ng=7.3.0=hdf63c60_0
  - liblief=0.10.1=he6710b0_0
  - libllvm10=10.0.1=hbcb73fb_5
  - libllvm9=9.0.1=he513fc3_1
  - libpng=1.6.37=hbc83047_0
  - libsodium=1.0.18=h7b6447c_0
  - libspatialindex=1.9.3=h2531618_0
  - libssh2=1.9.0=h1ba5d50_1
  - libstdcxx-ng=9.1.0=hdf63c60_0
  - libtiff=4.2.0=h85742a9_0
  - libtool=2.4.6=h7b6447c_1005
  - libuuid=1.0.3=h1bed415_2
  - libuv=1.40.0=h7b6447c_0
  - libwebp-base=1.2.0=h27cfd23_0
  - libxcb=1.14=h7b6447c_0
  - libxml2=2.9.10=hb55368b_3
  - libxslt=1.1.34=hc22bd24_0
  - llvmlite=0.36.0=py38h612dafd_4
  - locket=0.2.1=py38h06a4308_1
  - lxml=4.6.3=py38h9120a33_0
  - lz4-c=1.9.3=h2531618_0
  - lzo=2.10=h7b6447c_2
  - markupsafe=1.1.1=py38h7b6447c_0
  - matplotlib=3.3.4=py38h06a4308_0
  - matplotlib-base=3.3.4=py38h62a2d02_0
  - mccabe=0.6.1=py38_1
  - mistune=0.8.4=py38h7b6447c_1000
  - mkl=2021.2.0=h06a4308_296
  - mkl-service=2.3.0=py38h27cfd23_1
  - mkl_fft=1.3.0=py38h42c9631_2
  - mkl_random=1.2.1=py38ha9443f7_2
  - mock=4.0.3=pyhd3eb1b0_0
  - more-itertools=8.7.0=pyhd3eb1b0_0
  - mpc=1.1.0=h10f8cd9_1
  - mpfr=4.0.2=hb69a4c5_1
  - mpmath=1.2.1=py38h06a4308_0
  - msgpack-python=1.0.2=py38hff7bd54_1
  - multipledispatch=0.6.0=py38_0
  - mypy_extensions=0.4.3=py38_0
  - navigator-updater=0.2.1=py38_0
  - nbclassic=0.2.6=pyhd3eb1b0_0
  - nbclient=0.5.3=pyhd3eb1b0_0
  - nbconvert=6.0.7=py38_0
  - nbformat=5.1.3=pyhd3eb1b0_0
  - nccl=2.8.3.1=hcaf9a05_0
  - ncurses=6.2=he6710b0_1
  - nest-asyncio=1.5.1=pyhd3eb1b0_0
  - networkx=2.5=py_0
  - nltk=3.6.1=pyhd3eb1b0_0
  - nose=1.3.7=pyhd3eb1b0_1006
  - notebook=6.3.0=py38h06a4308_0
  - numba=0.53.1=py38ha9443f7_0
  - numexpr=2.7.3=py38h22e1b3c_1
  - numpy=1.20.1=py38h93e21f0_0
  - numpy-base=1.20.1=py38h7d8b39e_0
  - numpydoc=1.1.0=pyhd3eb1b0_1
  - olefile=0.46=py_0
  - openpyxl=3.0.7=pyhd3eb1b0_0
  - openssl=1.1.1o=h7f8727e_0
  - packaging=20.9=pyhd3eb1b0_0
  - pandas=1.2.4=py38h2531618_0
  - pandoc=2.12=h06a4308_0
  - pandocfilters=1.4.3=py38h06a4308_1
  - pango=1.45.3=hd140c19_0
  - parso=0.7.0=py_0
  - partd=1.2.0=pyhd3eb1b0_0
  - patchelf=0.12=h2531618_1
  - path=15.1.2=py38h06a4308_0
  - path.py=12.5.0=0
  - pathlib2=2.3.5=py38h06a4308_2
  - pathspec=0.7.0=py_0
  - pathtools=0.1.2=py_1
  - patsy=0.5.1=py38_0
  - pcre=8.44=he6710b0_0
  - pep8=1.7.1=py38_0
  - pexpect=4.8.0=pyhd3eb1b0_3
  - pickleshare=0.7.5=pyhd3eb1b0_1003
  - pillow=8.2.0=py38he98fc37_0
  - pip=21.0.1=py38h06a4308_0
  - pixman=0.40.0=h7b6447c_0
  - pkginfo=1.7.0=py38h06a4308_0
  - pluggy=0.13.1=py38h06a4308_0
  - ply=3.11=py38_0
  - prometheus_client=0.10.1=pyhd3eb1b0_0
  - prompt-toolkit=3.0.17=pyh06a4308_0
  - prompt_toolkit=3.0.17=hd3eb1b0_0
  - psutil=5.8.0=py38h27cfd23_1
  - ptyprocess=0.7.0=pyhd3eb1b0_2
  - py=1.10.0=pyhd3eb1b0_0
  - py-lief=0.10.1=py38h403a769_0
  - pycodestyle=2.6.0=pyhd3eb1b0_0
  - pycosat=0.6.3=py38h7b6447c_1
  - pycparser=2.20=py_2
  - pycurl=7.43.0.6=py38h1ba5d50_0
  - pydocstyle=6.0.0=pyhd3eb1b0_0
  - pyerfa=1.7.3=py38h27cfd23_0
  - pyflakes=2.2.0=pyhd3eb1b0_0
  - pygments=2.8.1=pyhd3eb1b0_0
  - pylint=2.7.4=py38h06a4308_1
  - pyls-black=0.4.6=hd3eb1b0_0
  - pyls-spyder=0.3.2=pyhd3eb1b0_0
  - pyodbc=4.0.30=py38he6710b0_0
  - pyopenssl=20.0.1=pyhd3eb1b0_1
  - pyparsing=2.4.7=pyhd3eb1b0_0
  - pyqt=5.9.2=py38h05f1152_4
  - pyrsistent=0.17.3=py38h7b6447c_0
  - pysocks=1.7.1=py38h06a4308_0
  - pytables=3.6.1=py38h9fd0a39_0
  - pytest=6.2.3=py38h06a4308_2
  - python=3.8.8=hdb3f193_5
  - python-dateutil=2.8.1=pyhd3eb1b0_0
  - python-jsonrpc-server=0.4.0=py_0
  - python-language-server=0.36.2=pyhd3eb1b0_0
  - python-libarchive-c=2.9=pyhd3eb1b0_1
  - python_abi=3.8=2_cp38
  - pytz=2021.1=pyhd3eb1b0_0
  - pywavelets=1.1.1=py38h7b6447c_2
  - pyxdg=0.27=pyhd3eb1b0_0
  - pyyaml=5.4.1=py38h27cfd23_1
  - pyzmq=20.0.0=py38h2531618_1
  - qdarkstyle=2.8.1=py_0
  - qt=5.9.7=h5867ecd_1
  - qtawesome=1.0.2=pyhd3eb1b0_0
  - qtconsole=5.0.3=pyhd3eb1b0_0
  - qtpy=1.9.0=py_0
  - readline=8.1=h27cfd23_0
  - regex=2021.4.4=py38h27cfd23_0
  - requests=2.25.1=pyhd3eb1b0_0
  - ripgrep=12.1.1=0
  - rope=0.18.0=py_0
  - rtree=0.9.7=py38h06a4308_1
  - ruamel_yaml=0.15.100=py38h27cfd23_0
  - scikit-image=0.18.1=py38ha9443f7_0
  - scikit-learn=0.24.1=py38ha9443f7_0
  - scipy=1.6.2=py38had2a1c9_1
  - seaborn=0.11.1=pyhd3eb1b0_0
  - secretstorage=3.3.1=py38h06a4308_0
  - send2trash=1.5.0=pyhd3eb1b0_1
  - setuptools=52.0.0=py38h06a4308_0
  - simplegeneric=0.8.1=py38_2
  - singledispatch=3.6.1=pyhd3eb1b0_1001
  - sip=4.19.13=py38he6710b0_0
  - six=1.15.0=py38h06a4308_0
  - snappy=1.1.8=he1b5a44_3
  - sniffio=1.2.0=py38h06a4308_1
  - snowballstemmer=2.1.0=pyhd3eb1b0_0
  - sortedcollections=2.1.0=pyhd3eb1b0_0
  - sortedcontainers=2.3.0=pyhd3eb1b0_0
  - soupsieve=2.2.1=pyhd3eb1b0_0
  - sphinx=4.0.1=pyhd3eb1b0_0
  - sphinxcontrib=1.0=py38_1
  - sphinxcontrib-applehelp=1.0.2=pyhd3eb1b0_0
  - sphinxcontrib-devhelp=1.0.2=pyhd3eb1b0_0
  - sphinxcontrib-htmlhelp=1.0.3=pyhd3eb1b0_0
  - sphinxcontrib-jsmath=1.0.1=pyhd3eb1b0_0
  - sphinxcontrib-qthelp=1.0.3=pyhd3eb1b0_0
  - sphinxcontrib-serializinghtml=1.1.4=pyhd3eb1b0_0
  - sphinxcontrib-websupport=1.2.4=py_0
  - spyder=4.2.5=py38h06a4308_0
  - spyder-kernels=1.10.2=py38h06a4308_0
  - sqlalchemy=1.3.20=py38h1e0a361_0
  - sqlite=3.35.4=hdfb4753_0
  - statsmodels=0.12.2=py38h27cfd23_0
  - sympy=1.8=py38h06a4308_0
  - tbb=2020.3=hfd86e86_0
  - tblib=1.7.0=py_0
  - terminado=0.9.4=py38h06a4308_0
  - testpath=0.4.4=pyhd3eb1b0_0
  - textdistance=4.2.1=pyhd3eb1b0_0
  - threadpoolctl=2.1.0=pyh5ca1d4c_0
  - three-merge=0.1.1=pyhd3eb1b0_0
  - tifffile=2020.10.1=py38hdd07704_2
  - tk=8.6.10=hbc83047_0
  - toml=0.10.2=pyhd3eb1b0_0
  - toolz=0.11.1=pyhd3eb1b0_0
  - tornado=6.1=py38h27cfd23_0
  - tqdm=4.59.0=pyhd3eb1b0_1
  - traitlets=5.0.5=pyhd3eb1b0_0
  - typed-ast=1.4.2=py38h27cfd23_1
  - typing_extensions=3.7.4.3=pyha847dfd_0
  - ujson=4.0.2=py38h2531618_0
  - unicodecsv=0.14.1=py38_0
  - unixodbc=2.3.9=h7b6447c_0
  - urllib3=1.26.4=pyhd3eb1b0_0
  - watchdog=1.0.2=py38h06a4308_1
  - wcwidth=0.2.5=py_0
  - webencodings=0.5.1=py38_1
  - werkzeug=1.0.1=pyhd3eb1b0_0
  - wheel=0.36.2=pyhd3eb1b0_0
  - widgetsnbextension=3.5.1=py38_0
  - wrapt=1.12.1=py38h7b6447c_1
  - wurlitzer=2.1.0=py38h06a4308_0
  - xlrd=2.0.1=pyhd3eb1b0_0
  - xlsxwriter=1.3.8=pyhd3eb1b0_0
  - xlwt=1.3.0=py38_0
  - xmltodict=0.12.0=pyhd3eb1b0_0
  - xz=5.2.5=h7b6447c_0
  - yaml=0.2.5=h7b6447c_0
  - yapf=0.31.0=pyhd3eb1b0_0
  - zeromq=4.3.4=h2531618_0
  - zict=2.0.0=pyhd3eb1b0_0
  - zipp=3.4.1=pyhd3eb1b0_0
  - zlib=1.2.11=h7b6447c_3
  - zope=1.0=py38_1
  - zope.event=4.5.0=py38_0
  - zope.interface=5.3.0=py38h27cfd23_0
  - zstd=1.4.5=h9ceee32_0
  - pip:
    - blis==0.7.4
    - catalogue==2.0.4
    - cymem==2.0.5
    - de-core-news-sm==3.1.0
    - decorator==4.4.2
    - dgl==0.6.1
    - en-core-web-sm==3.1.0
    - huggingface-hub==0.0.12
    - murmurhash==1.0.5
    - pathy==0.6.0
    - preshed==3.0.5
    - psycopg2==2.9.3
    - pydantic==1.8.2
    - sacremoses==0.0.45
    - smart-open==5.1.0
    - spacy==3.1.0
    - spacy-legacy==3.0.8
    - srsly==2.4.1
    - thinc==8.0.7
    - tokenizers==0.10.3
    - torch==1.9.0
    - torchtext==0.10.0
    - transformers==4.8.2
    - typer==0.3.2
    - wasabi==0.8.2
