# Supplementary material
Source: ML conference proceedings conference paper supplement (https://proceedings.neurips.cc/paper_files/paper/2022/hash/029f82afd78288059dc946b105c451fd-Abstract.html)
Supplement: Supplementary file 1 [file 029f82afd78288059dc946b105c451fd-Supplemental-Conference.zip › Supplementary Material/code/README.md]

# Aggregation Tree with Pseudo-Cube
---
Follow example.json to organize your database table structure into a configuration file, then run

``` 
python get_coreset.py coreset_size 0 config_file_address output_dir_name
python credit.py 1000 0 database_conf/yelp.json output_yelp 
```

If you want to get coreset in batch, please run

``` sh
sh run.sh database_conf/yelp.json output_dir_name coreset_size_min coreset_size_max coreset_size_step time_min time_max > log_file
sh run.sh database_conf/yelp.json output_yelp 500 1000 100 1 5 >> yelp.log
```

Please note that running our code requires that data is already stored in your database environment. The data set used in this paper can be found in our supplement.
